# Supplementary material
Source: PubMed Central journal article supplement (PMC7303662)
Supplement: mmc1.pdf [file mmc1.pdf]

## **Anexo 1: Listado de Investigadores del HJ23-COVID-19 Working Group**

### ***Laboratorio Clínico***

Natalia Bastón Paz, Carolina Sarvisé Buil, Frederic Gómez Bertomeu, Gemma Recio Comi, Carla Martin Grau, Silvia Montolio Brea, Victoria Rivera Moreno, Modest Sabaté Piñol, Carmen Molina Clavero, Nuria Serrat Orús, Maria Teresa Sans Mateu, Cristina Gutiérrez Fornes.

### ***Epidemiología y Prevención de la infección nosocomial***

M<sup>a</sup> Montserrat Olona Cabases

### ***Departamento de Enfermería UCI***

Xavier Teixidó, Diana Gil Castillejos, Nuria Burló Arévalo,

### ***Farmacia Clínica***

Laura Canadell, Erika Esteve Pitarch

### ***Médicos UCI***

María Bodi, Alejandro Rodríguez, Gerard Moreno, Christian Villavicencio, Mari Carmen Gilavert, Sara Rosich, Ángel Pobo, Mónica Magret, Gonzalo Sirgo, Vanessa Blázquez, Federico Esteban, Iulen Leache, Paula Perello, Iban Oliva, Manuel Samper, Oriol Plans, Marc Cartanyá, Sandra Canelles, Raquel Carbonell, Neus Guasch, Cristina Ferré, Sara Manrique, Xavier Daniel, Silvia Urgeles, Ivan David, Marina Roure, Natalia Murillo, Marina Sánchez, Melina Salgado.

### ***UCI Data-Analitics***

Josep Gómez, Manuel Ruiz-Botella, Jordi Albiol, Eduard Mayol
